# Supplementary material for: Successful Management of Uncomplicated Otitis Externa Using Short-Course Hydrocortisone-Oxytetracycline Ear Packing
Source: Research Square preprint supplement (doi:10.21203/rs.3.rs-6698056/v1), 2025-08-25
Supplement: Supplementary file 1 [file a608387e6ca61a90946745ee.docx]

# CARE Checklist for Case Report

Case Report Title: Successful Management of Uncomplicated Otitis Externa Using Short-Course Hydrocortisone-Oxytetracycline Ear Packing

Corresponding Author: Dr. Rinor Ajeti

| Checklist Item | Description | Reported in Line | Page Number |
| --- | --- | --- | --- |
| Title | The diagnosis or intervention of primary focus followed by the words 'case report' | 2 | 1 |
| Key Words | 2 to 5 key words that identify diagnoses or interventions including 'case report' | 8 | 1 |
| Abstract | Includes intro, symptoms, diagnosis, intervention, outcomes, and conclusion | 4 | 1 |
| Introduction | Why this case is unique | 10 | 1 |
| Patient Information | De-identified patient details, history, prior interventions | 20 | 2 |
| Clinical Findings | Significant PE and clinical findings | 25 | 2 |
| Timeline | Historical and current info as a timeline | 30 | 2 |
| Diagnostic Assessment | Tests, challenges, diagnoses | 27 | 2 |
| Therapeutic Intervention | Type, administration, changes | 28 | 2 |
| Follow-up and Outcomes | Outcomes, follow-up test results | 30 | 2 |
| Discussion | Strengths/limits, literature, rationale, take-away | 33 | 3 |
| Patient Perspective | Patient’s own description of their experience | 58 | 4 |
| Informed Consent | Confirmation of patient consent for publication | 59 | 4 |
